# Supplementary material for: Interactive Effects of Epichloë Endophyte, Dormancy-Breaking Treatments and Geographic Origin on Seed Germination of Achnatherum inebrians
Source: MDPI journal article supplement (doi:10.3390/microorganisms9112183), 2021-10-20
Supplement: s1 [file s1]

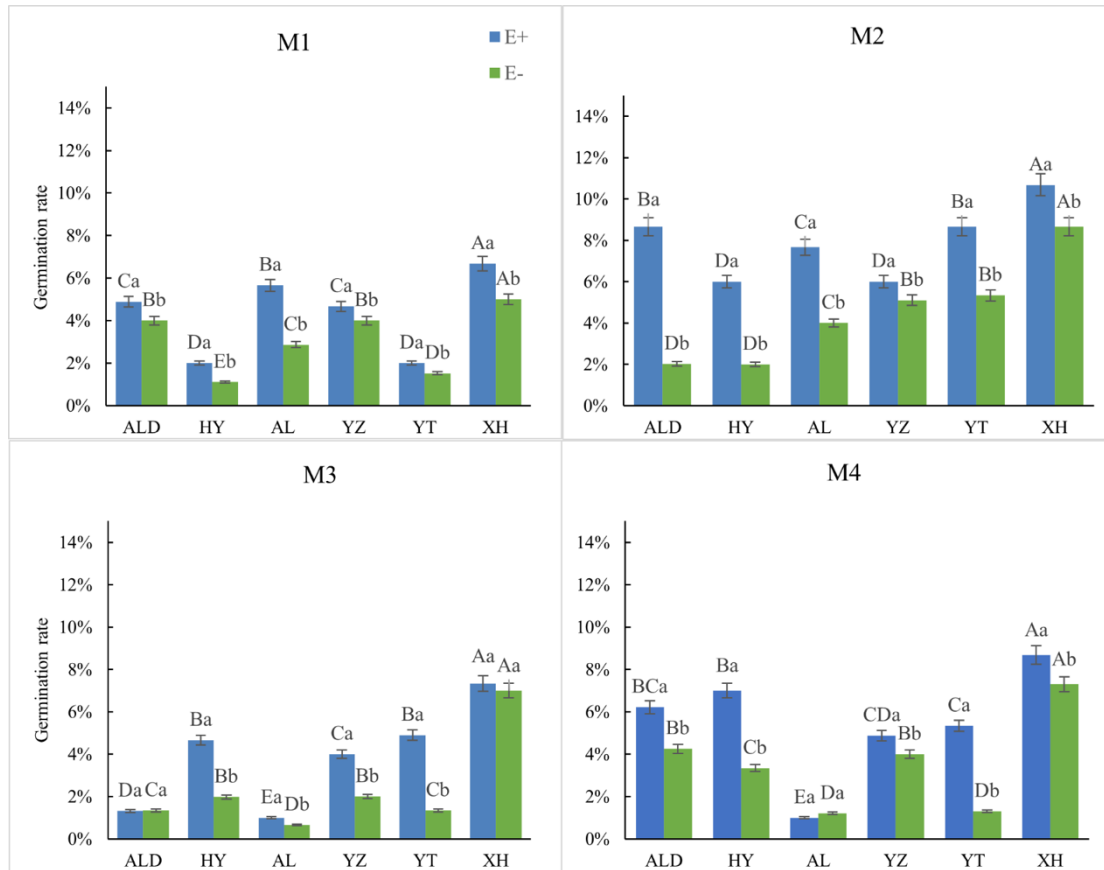

**Figure S1.** Germination rate of infected (E+) and non-infected (E-) *Achnatherum inebrians* from different treatments on an altitude (origin) gradient. The different capital letters indicate the mean significant difference ( $p < 0.05$ ) in endophyte status (E+ or E-) in seed germination under different origin. The different lowercase letters indicate the mean significant difference ( $p < 0.05$ ) in the pair-wise comparisons of endophyte status (E+ and E-) in seed germination in the same origin.
